# Supplementary material for: Rational Mutagenesis in the Lid Domain of Ribokinase from E. coli Results in an Order of Magnitude Increase in Activity towards D-arabinose
Source: MDPI journal article supplement (doi:10.3390/ijms232012540), 2022-10-19
Supplement: s1 [file s1]

## Supplementary material

### Rational Mutagenesis in the Lid Domain of Ribokinase from *E. coli* Results in an Order of Magnitude Increase in Activity towards D-arabinose

Evgeniy A. Zayats\*, Ilya V. Fateev, Maria A. Kostromina, Yulia A. Abramchik, Dmitry D. Lykoshin, Daria O. Yurovskaya, Vladimir I. Timofeev, Maria Ya. Berzina, Barbara Z. Eletskaia, Irina D. Konstantinova\* and Roman S. Esipov

Shemyakin and Ovchinnikov Institute of Bioorganic Chemistry, Russian Academy of Sciences, Miklukho-Maklaya St. 16/10, 117997, Moscow, Russia

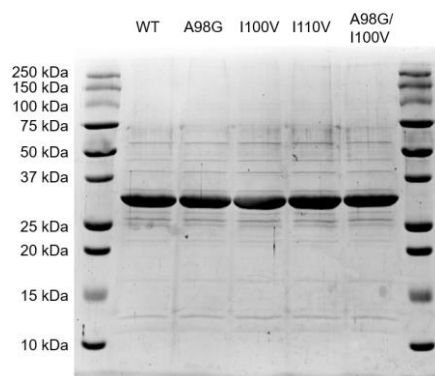

Figure S1. SDS PAGE analysis of the wild type *EcoRK* and the four investigated mutant forms (5  $\mu$ g of protein per lane). Marker - Precision Plus Protein All Blue Standard, Biorad.

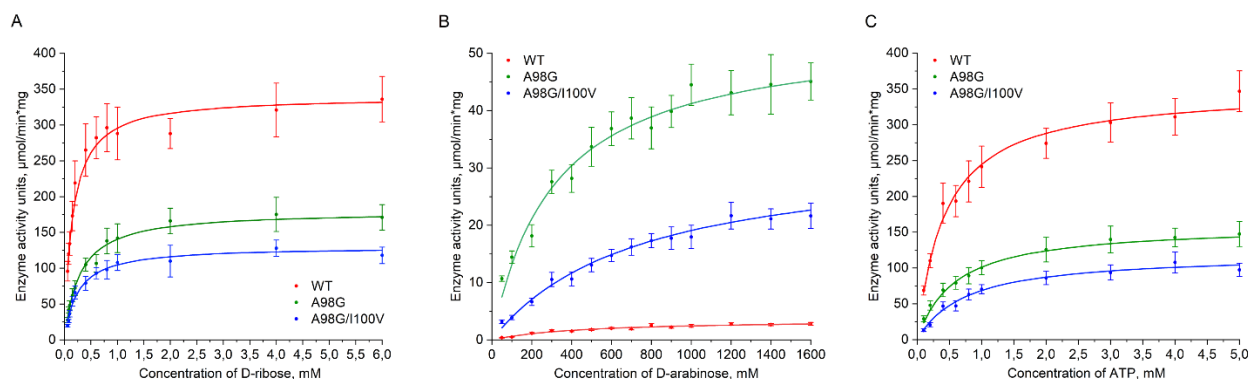

Figure S2. Michaelis-Menten plots for the enzymatic activity of wild type *EcoRK*, A98G and A98G/I100V mutants towards D-ribose (A), D-arabinose (B) and ATP (C). Data represented in mean values and standard deviation (three repeats).
